# Supplementary material for: A γ-turn mimetic for selective sensing of Cu(ii) and a combinatorial multiple logic gate
Source: Royal Society of Chemistry journal article supplement (doi:10.1039/d2ce00462c), 2022-01-01
Supplement: d2ce00462c1.pdf [file d2ce00462c1.pdf]

## *Supporting Information*

### **A $\gamma$ -turn mimetic for selective sensing of Cu(II) and combinatorial multiple logic gate**

Srayoshi Roy Chowdhury<sup>a</sup> and Debasish Halder<sup>\*a,b</sup>

<sup>a</sup>Department of Chemical Sciences, Indian Institute of Science Education and Research  
Kolkata, Mohanpur-741246, West Bengal, India.

<sup>b</sup>Centre for Advanced Functional Materials (CAFAM), Indian Institute of Science Education and  
Research, Kolkata, Mohanpur-741246, West Bengal, India.

E-mail: deba\_h76@yahoo.com ; deba\_h76@iiserkol.ac.in

# Table of Contents

|                                                    |    |
|----------------------------------------------------|----|
| 1. Supporting information Figure S1 .....          | S3 |
| 2. Supporting information Figure S2.....           | S3 |
| 3. Supporting information Figure S3.....           | S4 |
| 4. Supporting information Figure S4.....           | S4 |
| 5. Supporting information Figure S5.....           | S5 |
| 6. Supporting information Figure S6.....           | S5 |
| 7. Supporting information Table S1 .....           | S5 |
| 8. Synthesis and Characterization of compound..... | S6 |

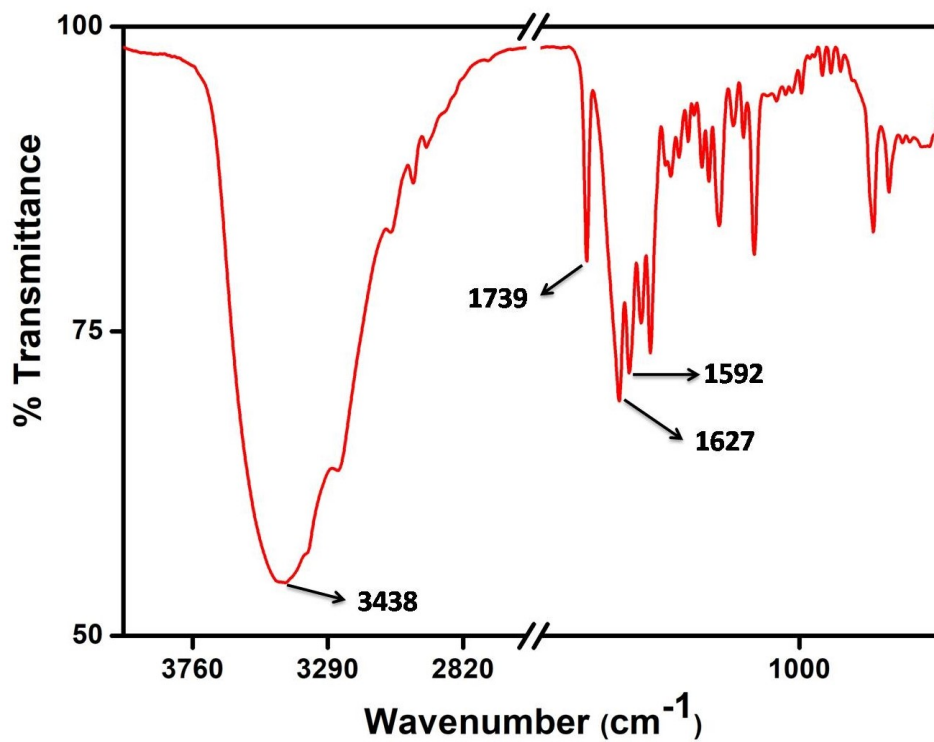

**Figure S1:** Solid- state FT-IR spectra of  $\gamma$ -turn mimetic **1**.

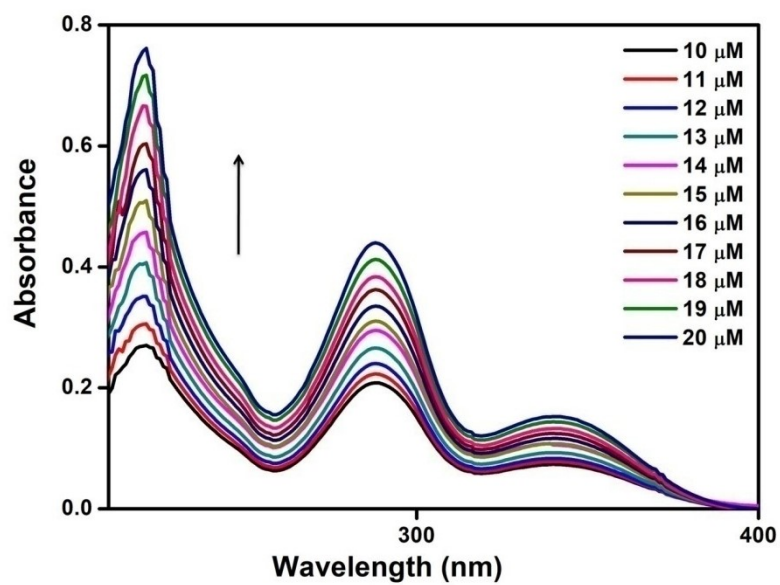

**Figure S2:** Concentration dependent UV-Vis spectra of  $\gamma$ -turn mimetic **1** in acetonitrile.

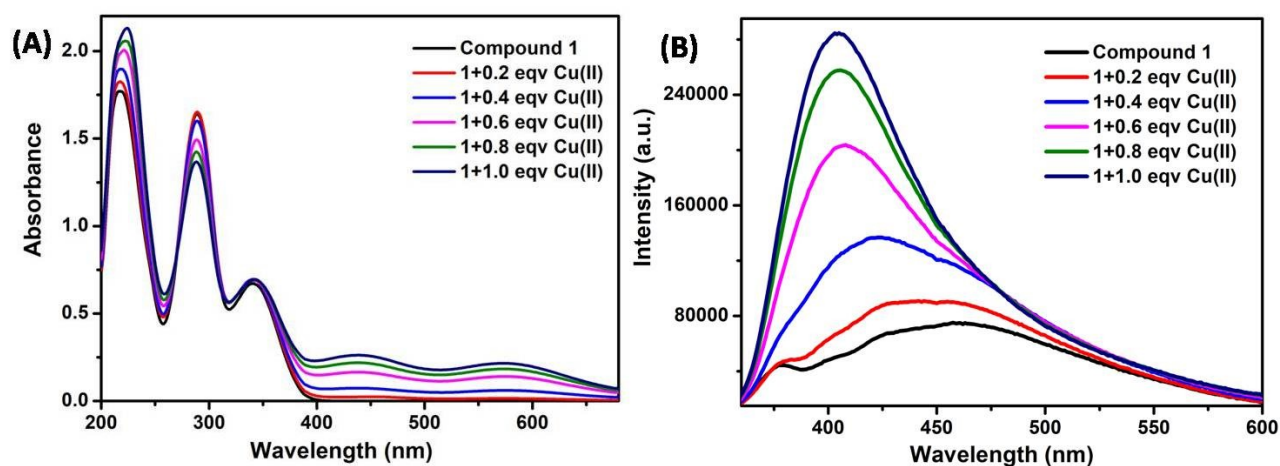

**Figure S3:** Change in (A) Absorption spectra and (B) Fluorescence spectra of  $\gamma$ -turn mimetic **1** ( $c = 1.0 \times 10^{-4}$  M) upon addition of different concentration of Cu (II) salt in acetonitrile solution. (Excitation Wavelength = 340 nm)

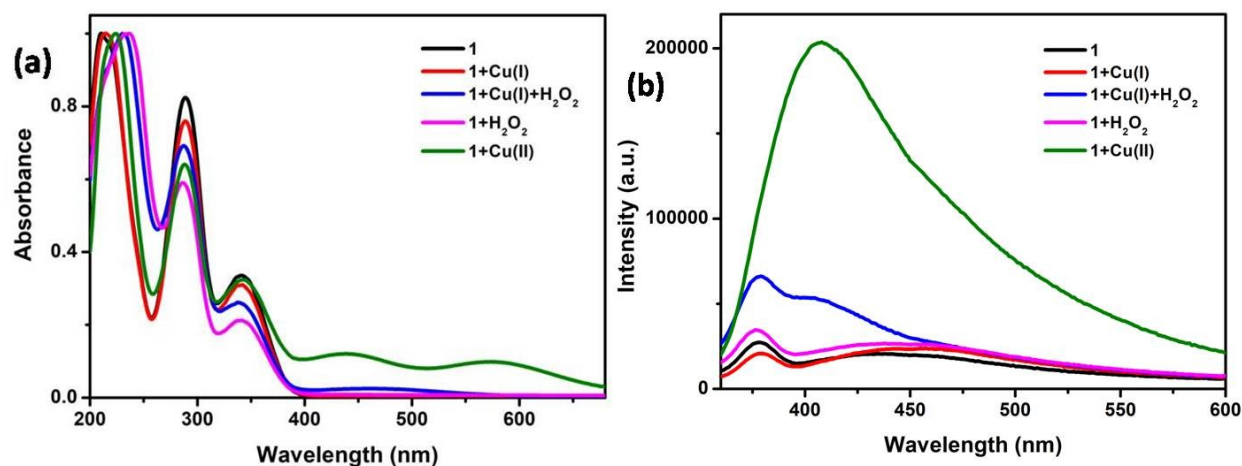

**Figure S4:** (a) Absorption and (b) Emission spectra of  $\gamma$ -turn mimetic **1** ( $c = 1.0 \times 10^{-4}$  M) in the presence of Cu (II), Cu (I), H<sub>2</sub>O<sub>2</sub> and a mixture of Cu (I) and H<sub>2</sub>O<sub>2</sub> ( $c = 1.0 \times 10^{-2}$  M) in acetonitrile solution. (Excitation Wavelength = 340 nm)

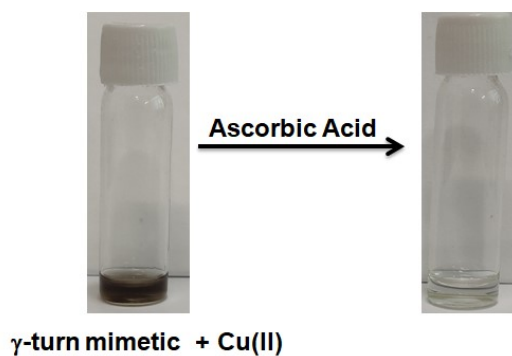

**Figure S5:** (a) Colour of  $\gamma$ -turn mimetic **1** ( $c = 1.0 \times 10^{-4}$  M) in the presence of Cu (II) in acetonitrile solution and after addition of ascorbic acid ( $c = 4.0 \times 10^{-4}$  M).

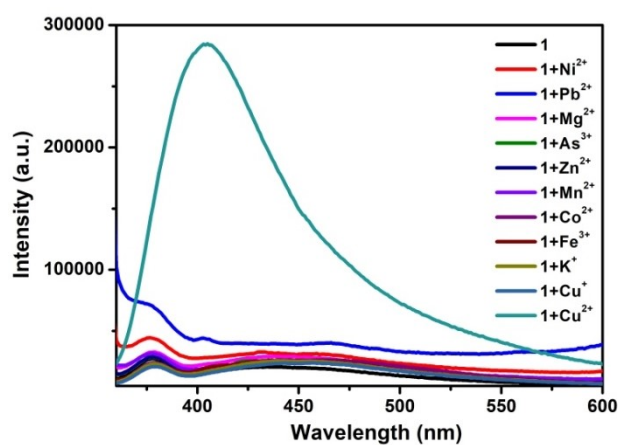

**Figure S6:** Emission spectra of  $\gamma$ -turn mimetic **1** ( $c = 1.0 \times 10^{-4}$  M) in the presence of different metals in acetonitrile solution. (Excitation Wavelength = 340 nm)

|                                  |                                                               |
|----------------------------------|---------------------------------------------------------------|
| Formula                          | C <sub>18</sub> H <sub>20</sub> N <sub>2</sub> O <sub>3</sub> |
| Formula Weight                   | 312.36                                                        |
| Crystal System                   | monoclinic                                                    |
| Space group                      | P2 <sub>1</sub> /c                                            |
| a, b, c [Angstrom]               | 16.8282(6), 10.4619(4), 9.5748(4)                             |
| alpha, beta, gamma [deg]         | 90, 100.788(4), 90                                            |
| V [Ang**3]                       | 1655.90(11)                                                   |
| Z                                | 4                                                             |
| D(calc) [g/cm**3]                | 1.253                                                         |
| Mu(MoKa) [ /mm ]                 | 0.086                                                         |
| F(000)                           | 664                                                           |
| Crystal Size [mm]                | 0.01 x 0.02 x 0.03                                            |
| Data Collection Temperature (K)  | 293                                                           |
| Radiation [Angstrom] MoKa        | 0.71073                                                       |
| Theta Min-Max [Deg]              | 2.3, 25.0                                                     |
| Dataset                          | 20: 19 ; -12: 11 ; -11: 10                                    |
| Tot., Uniq. Data, R(int)         | 8501, 2918, 0.048                                             |
| Observed Data [I > 0.0 sigma(I)] | 2455                                                          |
| Refinement Nref, Npar            | 2918, 211                                                     |
| R, wR2, S                        | 0.0443, 0.1128, 1.10                                          |

**Table S1:** Crystal data and structure refinement of  $\gamma$ -turn mimetic **1**.

**Synthesis of  $\gamma$ -turn mimetic **1**:**

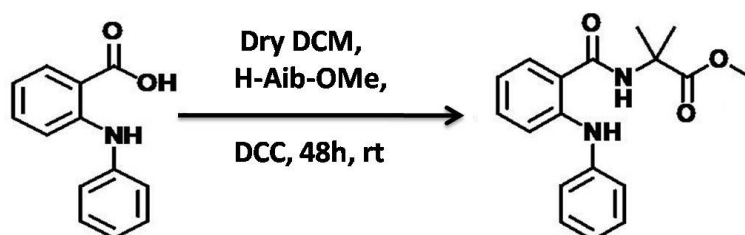

**Scheme 1:** The schematic representation for the synthesis of  $\gamma$ -turn mimetic **1**.

For concentration dependent absorption and emission spectroscopy study,  $10^{-5}$  (M)  $\gamma$ -turn mimetic 1 solution was prepared in acetonitrile and then concentration increases gradually by addition of  $10^{-3}$  (M) concentrated solution and every time the UV-Vis spectra was measured. For metal detection study,  $10^{-4}$  (M)  $\gamma$ -turn mimetic 1 solution was prepared in acetonitrile and different metals have used in 1:1 equivalent and then the fluorescence and UV-Vis experiment were performed.

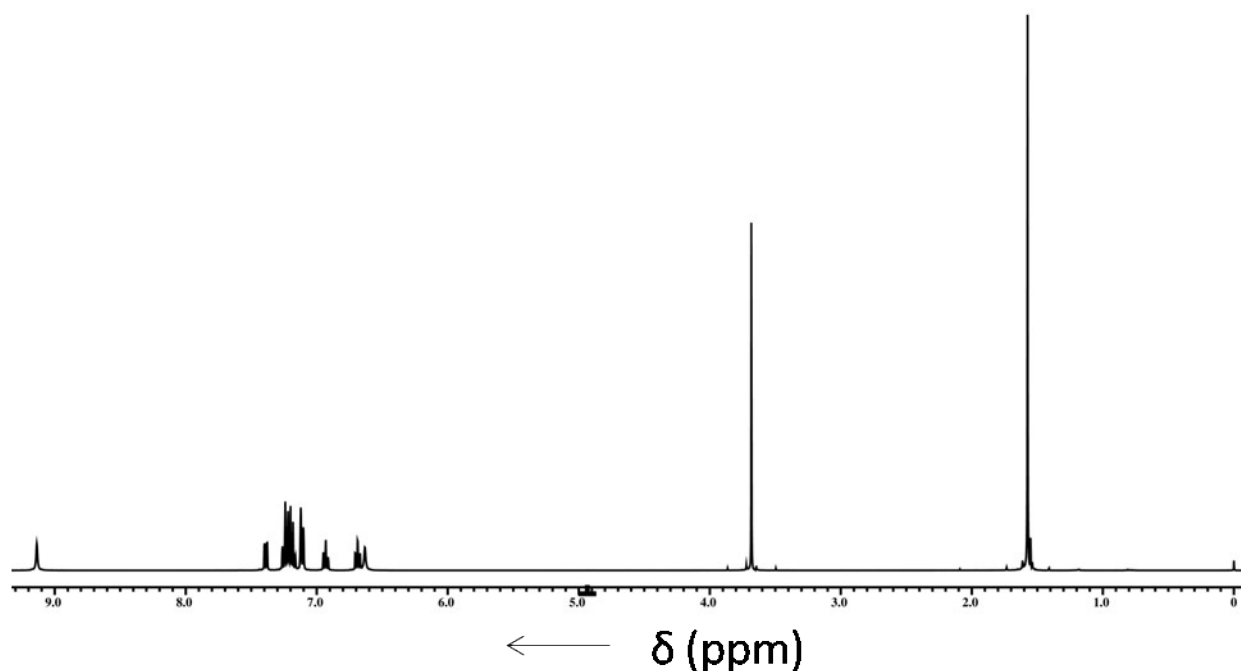

**Figure S7:**  $^1\text{H}$  NMR spectra (400 MHz,  $\text{CDCl}_3$ ,  $\delta$  ppm, 298K) of  $\gamma$ -turn mimetic 1.

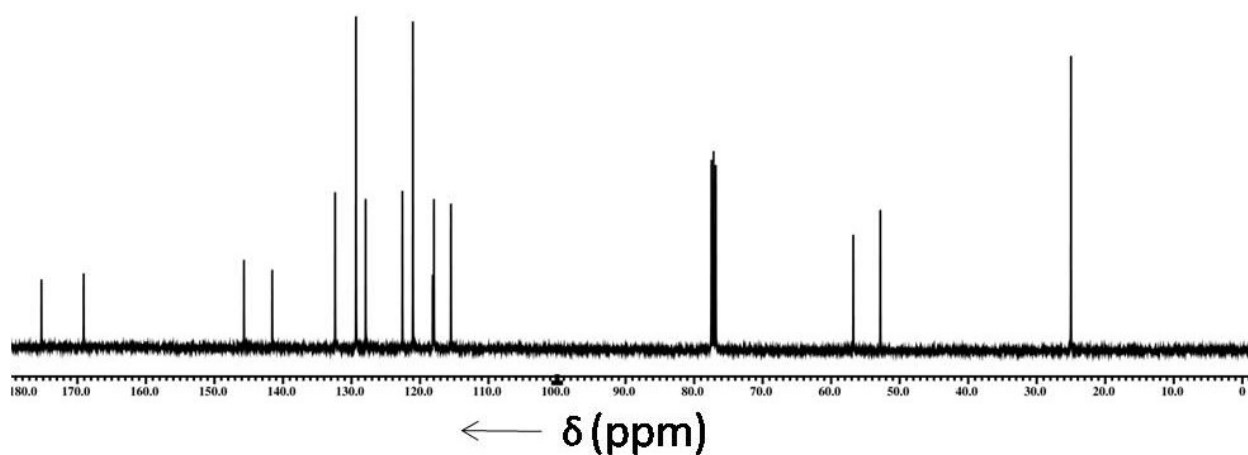

**Figure S8:**  $^{13}\text{C}$  NMR spectra (100 MHz,  $\text{CDCl}_3$ ,  $\delta$  ppm, 298K) of  $\gamma$ -turn mimetic 1.

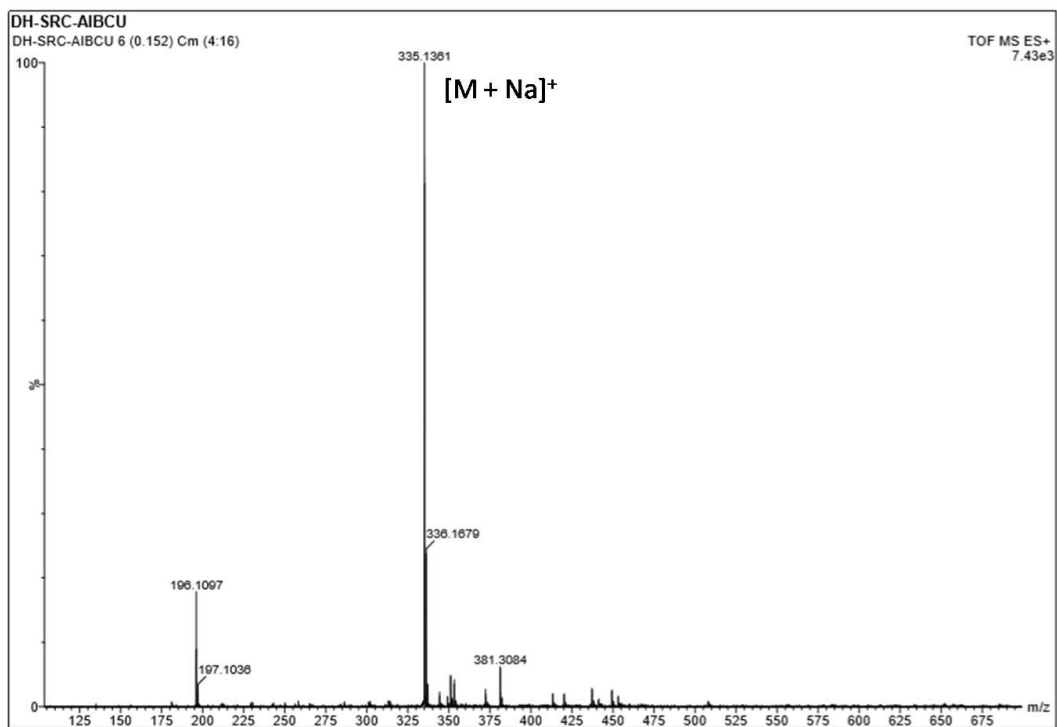

**Figure S9:** Mass spectra of  $\gamma$ -turn mimetic **1**.
